# Supplementary material
Source: PubMed Central journal article supplement (PMC9309980)
Supplement: NIHMS1823668-supplement-Supplementary_Material.pdf [file NIHMS1823668-supplement-Supplementary_Material.pdf]

**Supplementary information**

---

**Childhood amyotrophic lateral sclerosis  
caused by excess sphingolipid synthesis**

---

In the format provided by the  
authors and unedited

**Table S1.** Clinical features of patients with *SPTLC1* variants associated with hereditary amyotrophic lateral sclerosis

| Family                                 | 1                   | 2                   | 3                   | 4                   | 5                   | 6                     | 7                                  | 7                       | 7                   | 7                   | 7                   |
|----------------------------------------|---------------------|---------------------|---------------------|---------------------|---------------------|-----------------------|------------------------------------|-------------------------|---------------------|---------------------|---------------------|
| Patient                                | 1                   | 2                   | 3                   | 4                   | 5                   | 6                     | I-1                                | II-1                    | II-2                | II-3                | II-4                |
| <i>SPTLC1</i> <sup>a</sup> variant     | p.(Y23F)            | p.(Y23F)            | p.(F40_S41del)      | p.(L39del)          | p.(L39del)          | p.(A20S) <sup>b</sup> | p.(L39del)                         | p.(L39del)              | p.(L39del)          | p.(L39del)          | p.(L39del)          |
| Inheritance                            | De novo               | AD                                 | AD                      | AD                  | AD                  | AD                  |
| Sex/Age at last examination (years)    | F/16                | F/8                 | F/28                | M/28                | M/13                | M/21                  | M/62                               | F/27                    | F/25                | M/21                | F/19                |
| Symptom Onset (years)                  | LE spasticity (4)   | LE spasticity (3)   | LE spasticity (4)   | Toe walking (8)     | Falls (3)           | Not able to run (3)   | Ankle sprains (15); numb toes (30) | UE discoordination (16) | Abnl Gait (14)      | Abnl Gait (10)      | Abnl Gait (6)       |
| Progressive Weakness                   | +                   | +                   | +                   | +                   | +                   | +                     | +                                  | +                       | +                   | +                   | +                   |
| Loss of Ambulation (years)             | 13                  | A                   | 13                  | 17                  | 10                  | 10                    | A                                  | 19 <sup>c</sup>         | 23                  | 14 <sup>c</sup>     | 13 <sup>c</sup>     |
| Respiratory Insufficiency <sup>d</sup> | ++                  | -                   | ++                  | +                   | -                   | ++                    | -                                  | -                       | -                   | -                   | -                   |
| Cognition                              | NI                  | NI                  | NI                  | NI                  | NI                  | NI                    | NI                                 | NI                      | NI                  | NI                  | NI                  |
| Exam: LMN signs                        | Cr, C, L              | C,L                                | Cr, C, L                | Cr, C, L            | Cr, C, L            | Cr, C, L            |
| Exam: UMN signs                        | Cr, C, L              | L                                  | L                       | L                   | L                   | -                   |
| Sensory Exam <sup>e</sup>              | NI                  | NI                  | NI                  | NI                  | NI                  | NI                    | ↓P, ↓T, ↓V, ↓Pr                    | NI                      | NI                  | NI                  | NI                  |
| Sensory NCS                            | NI                  | NI                  | NI                  | NI                  | NI                  | NI                    | ↓amp/absent                        | NI                      | NI                  | NI                  | NI                  |
| Motor NCS: CMAP                        | ↓amp, NI DL, NI NCV   | ↓amp/absent, NI DL, NI NCV         | ↓amp, NI DL, NI NCV     | ↓amp, NI DL, NI NCV | ↓amp, NI DL, NI NCV | ↓amp, NI DL, NI NCV |
| EMG: Fib/PSW                           | +                   | Not performed       | +                   | +                   | -                   | Not performed         | +                                  | +                       | +                   | +                   | +                   |
| EMG: MUAP                              | ↑amp, ↑duration     | Not performed       | ↑amp, ↑duration     | ↑amp, ↑duration     | ↑amp, ↑duration     | Not performed         | ↑amp, ↑duration                    | ↑amp, ↑duration         | ↑amp, ↑duration     | ↑amp, ↑duration     | ↑amp, ↑duration     |

a Transcript ID: NM\_006415.4

b This variant results in a splicing defect, predominantly causing exon 2 skipping.

c Uses a wheelchair outside of the home, but able to walk short distances.

d ++ =use of non-invasive or invasive (i.e. tracheostomy) ventilatory support. + = reduced forced vital capacity without non-invasive ventilation

e Bedside sensory testing assessing pinprick (P), temperature (T), vibration (V) and proprioception (Pr)

M=male, F=female, AD= autosomal dominant, LE= lower extremity, UE= upper extremity, Abnl=abnormal, A=ambulatory, NI=normal, UMN= upper motor neuron signs, LMN= lower motor neuron signs/weakness, Cr=cranial, C=cervical, L=lumbar, NCS=nerve

conduction studies, EMG= electromyography, CMAP=compound muscle action potential, amp=amplitude, DL=distal latency, NCV=nerve conduction velocity, Fib=fibrillation potential, PSW= positive sharp wave, MUAP=motor unit action potential morphology.

**Table S2.** Four novel *SPTLC1* variants associated with amyotrophic lateral sclerosis

| Genomic location <sup>a</sup> | Nucleotide Change <sup>b</sup> | Predicted Amino Acid Change | Exon | Polyphen-2               | CADD | gnomAD AF      | ACMG Variant Classification <sup>1</sup> |
|-------------------------------|--------------------------------|-----------------------------|------|--------------------------|------|----------------|------------------------------------------|
| 9:92112562                    | c.58G>T                        | p.A20S                      | 2    | 0.973; Probably damaging | 28   | 0              | Likely Pathogenic (PS2, PM2, PP3)        |
| 9:92112552                    | c.68A>T                        | p.Y23F                      | 2    | 0.973; Probably damaging | 24   | 0              | Likely Pathogenic (PS2, PM2, PP3)        |
| 9:92112503-505                | c.115_117delCTT                | p.L39del <sup>c</sup>       | 2    | NA                       | 19   | 0 <sup>d</sup> | Likely Pathogenic (PS2, PM2, PM4, PP3)   |
| 9:92112497-502                | c.118_123delTTCTCT             | p.F40_S41del                | 2    | NA                       | 19   | 0              | Likely Pathogenic (PS2, PM2, PM4, PP3)   |

a Genome reference GRCh38;

b Transcript ID: NM\_006415.4

c Due to the repeat sequence (CTTCTT), the distinction of L39 vs L38 deleted residues based on genetic sequencing in humans is not possible; c.115\_117delCTT, p.L39del is the current consensus Human Genome Variation Society format for reporting this variant.

d This variant is noted in a single allele (4e-6 allele frequency) in the gnomAD database (v2.1.1) in an individual from the neurologic/psychiatric cohort.

Polyphen-2 (<http://genetics.bwh.harvard.edu/pph2>) CADD= Combined Annotation Dependent Depletion score (<https://cadd.gs.washington.edu>) , gnomAD AF = Genome aggregate database allele frequency (v3.1) (<https://gnomad.broadinstitute.org>), ACMG=American College of Medical Genetics. NA= Not available for deletion variants.

1. Richards, S. *et al.* Standards and guidelines for the interpretation of sequence variants: a joint consensus recommendation of the American College of Medical Genetics and Genomics and the Association for Molecular Pathology. *Genet Med* **17**, 405-24 (2015).

**Table S3.** Inhibition of serine-palmitoyltransferase activity by increasing ORMDL concentrations.  $IC_{50}$  and 95% confidence interval for each *SPTLC1* variant was calculated using a least squares, non-linear regression.

| <b>Genotype</b> | <b><math>IC_{50}</math> (95% CI) ng</b> |
|-----------------|-----------------------------------------|
| Wildtype        | 19.25 (14.7-24.46)                      |
| Y23F            | 70.04 (55.53-87.8)                      |
| Del39           | 236.7 (174.2-323.7)                     |
| E2del           | 376.5 (302.3-473.1)                     |
| Del40_41        | 361.4 (282.2-467.6)                     |

**Table S4.** Details of clinical and research based genetic testing in each family with *SPTLC1*-associated amyotrophic lateral sclerosis

| Family | Methodology                 | Library preparation                             | Sequencing platform                              | Alignment/Calling/Annotation                               | Testing site                       |
|--------|-----------------------------|-------------------------------------------------|--------------------------------------------------|------------------------------------------------------------|------------------------------------|
| 1      | WES                         | SeqCap EZ Exome + UTR Library (Roche)           | TruSeq V2:39 (Illumina)                          | Varsifter <sup>50</sup>                                    | NIH                                |
| 2      | WES                         | GeneDx capture system                           | HiSeq (Illumina)                                 | XomeAnalyzer (GeneDx)                                      | GeneDx                             |
| 3      | Hereditary neuropathy panel |                                                 | Multiplex Ligation-dependent Probe Amplification |                                                            | ARUP Laboratories                  |
| 4      | WES                         | GeneDx capture system                           | HiSeq (Illumina)                                 | XomeAnalyzer (GeneDx)                                      | GeneDx                             |
| 5      | WES                         | Nextera Exome Capture                           | HiSeq (Illumina)                                 | In-house software                                          | Mendelics                          |
| 6      | WES                         | Nextera Rapid Capture Exome Kit 38Mb (Illumina) | HiSeq 4000 (Illumina)                            | BWA/ GATK Haplotype Caller/ Variant Effect Predictor (VEP) | Broad Institute of MIT and Harvard |
| 7      | WES                         | GeneDx capture system                           | HiSeq (Illumina)                                 | XomeAnalyzer (GeneDx)                                      | GeneDx                             |

**Table S5.** Primers and probes used in this manuscript.

| <b>Primer or probe</b> | <b>Sequence</b>                                            | <b>Figure/section</b>        |
|------------------------|------------------------------------------------------------|------------------------------|
| qPCR-del40_41-F        | 5'— CTCTGGATAATCAGACTTCTTAAG —3'                           | Fig 4a                       |
| qPCR-del40_41-R        | 5'— TTGGGACAGGAGGAACAA —3'                                 | Fig 4a                       |
| Del40_41 probe         | 5'-/56-FAM/TGATTGAAG/ZEN/AGTGGCAACCAGAACCT/3IABKFQ/-3'     | Fig 4a                       |
| qPCR-del39-F           | 5'— CCTCTGGATAATCAGACTTTTC —3'                             | Fig 4a                       |
| qPCR-del39-R           | 5'— GTAGTTGAGAGCAGGATGG—3'                                 | Fig 4a                       |
| Del39 Probe            | 5'-/56-FAM/ACCTCTTGT /ZEN/TCCTCCTGTCCCAAA/3IABKFQ/-3'      | Fig 4a                       |
| qPCR-del39/wt-F        | 5'— TCCTCTGGATAATCAGACTTCTT —3'                            | Fig 4a                       |
| qPCR-del39/wt-R        | 5'— CTGGTTGCCACTCTTCAATC—3'                                | Fig 4a                       |
| Del39/wt Probe         | 5'-/56-FAM/ACAAGAACG/ZEN/ATCTGATCTTACAGTCAAGGA/3IABkFQ/-3' | Fig 4a                       |
| qPCR-total SPTLC1-F    | 5'—TCTTGGATTGTTGGATAACCCTA—3'                              | Fig 4a, Extended Data Fig 5a |
| qPCR-total SPTLC1-R    | 5'—GTCCCCACGCCATACTTCT—3'                                  | Fig 4a, Extended Data Fig 5a |
| qPCR-SPTLC1 probe      | Probe #74-Roche Universal Probe Library                    | Fig 4a, Extended Data Fig 5a |
| qPCR-PGK1-F            | 5'— CAGCTGCTGGGTCTGTCAT —3'                                | Fig 4a, Extended Data Fig 5a |
| qPCR-PGK1-R            | 5'— GCTGGCTCGGCTTTAACCC —3'                                | Fig 4a, Extended Data Fig 5a |
| PGK1 probe             | Probe #67-Roche Universal Probe Library                    | Fig 4a, Extended Data Fig 5a |
| SPTLC1-cDNA -F         | 5'— TGCGGAGGTGATAACGACAC —3'                               | Extended Data Fig 2          |

|                     |                                |                     |
|---------------------|--------------------------------|---------------------|
| SPTLC1-cDNA -R      | 5'— CAGGCGGTCTTCCAAATCCA —3'   | Extended Data Fig 2 |
| SPTLC1-gDNA-F       | 5'— AGGCTAAAAGTCACAGGAGGC —3'  | iPSC-CRISPR         |
| SPTLC1-gDNA-R       | 5'— GGTTGAGCCACCACAAATCC —3'   | iPSC-CRISPR         |
| SPTLC1-seq gDNA - F | 5'— TGTGCAGGTGTTAGAAGTGTA —3'  | iPSC-CRISPR         |
| SPTLC1-seq gDNA - R | 5'— TTTCTGGAAAGACATAGCAACT —3' | iPSC-CRISPR         |



**Table S6.** Sequence of siRNAs used in this manuscript

| siRNA              | Sequence                                                                        |
|--------------------|---------------------------------------------------------------------------------|
| Del40_41 targeting | 5' ----AAUCAGACUUCUUAAGACAdTdT---- 3'<br>3'---dTdTUUAGUCUGAAGAAUUCUGA---- 5'    |
| Del39 targeting    | 5'----UGGAUAAUCAGACUUUUCUCAdTdT---- 3'<br>3'---dTdTACCUAUUAGUCUGAAAAGAGA---- 5' |
| Scrambled          | Dharmacon Inc., D-001810-01                                                     |
